# Supplementary material
Source: PubMed Central journal article supplement (PMC7097992)
Supplement: ao0c00156_si_001.pdf [file ao0c00156_si_001.pdf]

## Supporting Information

Solubility of azilsartan in methanol, ethanol, acetonitrile, n-propanol, isopropanol, tetrahydrofuran and binary solvent mixtures between 293.15K and 333.15K

Haojie Xu<sup>1,2</sup>, Lingling Kang<sup>1</sup>, Jinmei Qin<sup>1</sup>, Jiayu Lin<sup>1</sup>, Min Xue<sup>1\*</sup>, Zihui Meng<sup>1</sup>

1. School of Chemistry and Chemical Engineering, Beijing Institute of Technology, Beijing, China, 102488
2. Shandong Xinhua Pharmaceutical Company Limited, Shandong, China, 255005

Figure S1. The X-ray powder diffractogram of azilsartan in methanol

Figure S2. The X-ray powder diffractogram of azilsartan in ethanol

Figure S3. The X-ray powder diffractogram of azilsartan in acetonitrile

Figure S4. The X-ray powder diffractogram of azilsartan in n-propanol

Figure S5. The X-ray powder diffractogram of azilsartan in methanol/water(8/2,v/v)

Figure S6. The X-ray powder diffractogram of azilsartan in ethanol/water(8/2,v/v)

Figure S7. The X-ray powder diffractogram of azilsartan in ethanol/water(5/5,v/v)

Figure S8. The X-ray powder diffractogram of azilsartan in isopropanol

Figure S9. The X-ray powder diffractogram of azilsartan in tetrahydrofuran

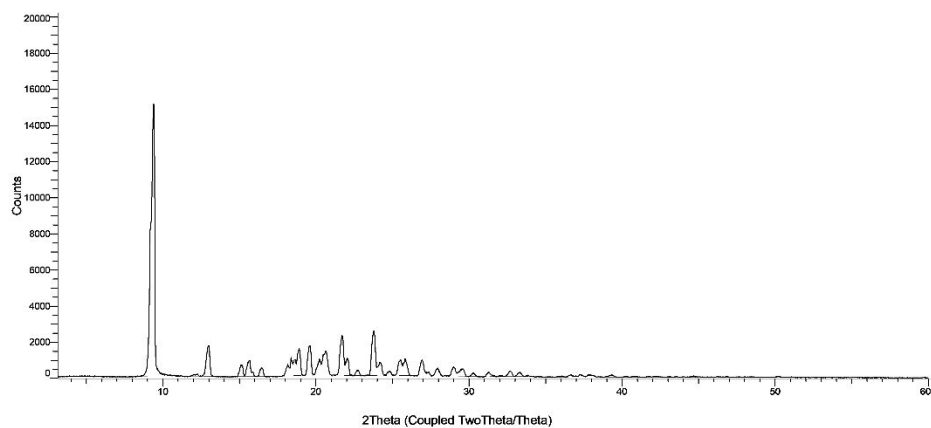

Figure S1. The X-ray powder diffractogram of azilsartan in methanol

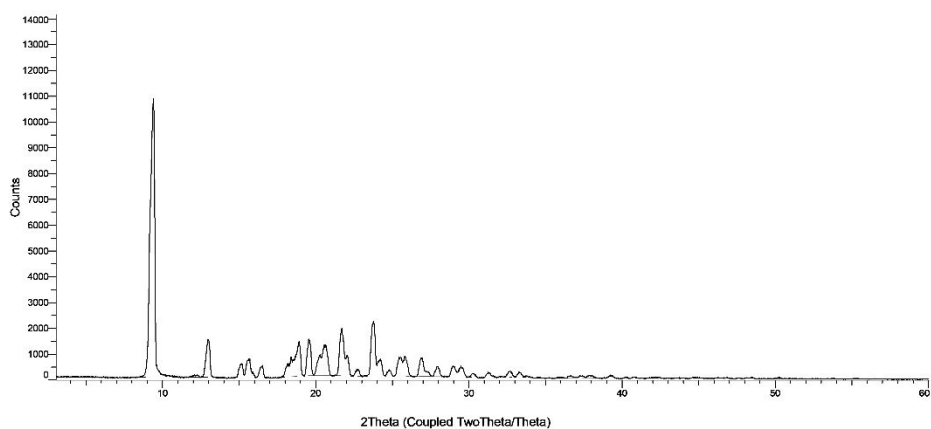

Figure S2. The X-ray powder diffractogram of azilsartan in ethanol

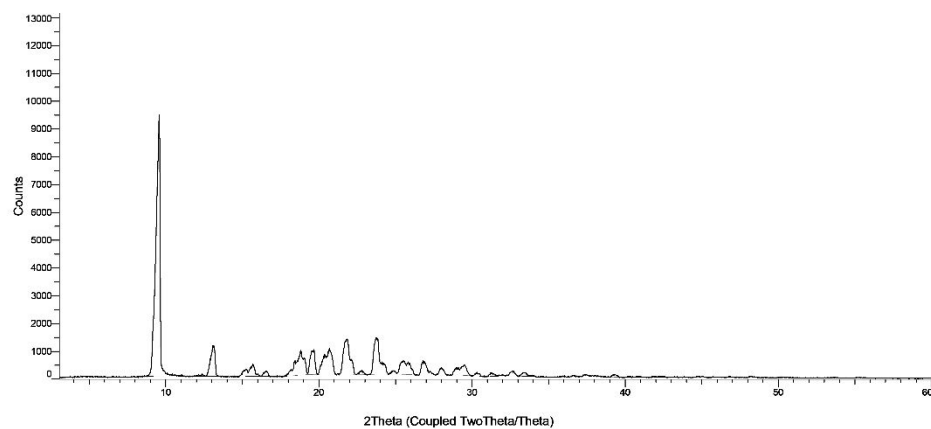

Figure S3. The X-ray powder diffractogram of azilsartan in acetonitrile

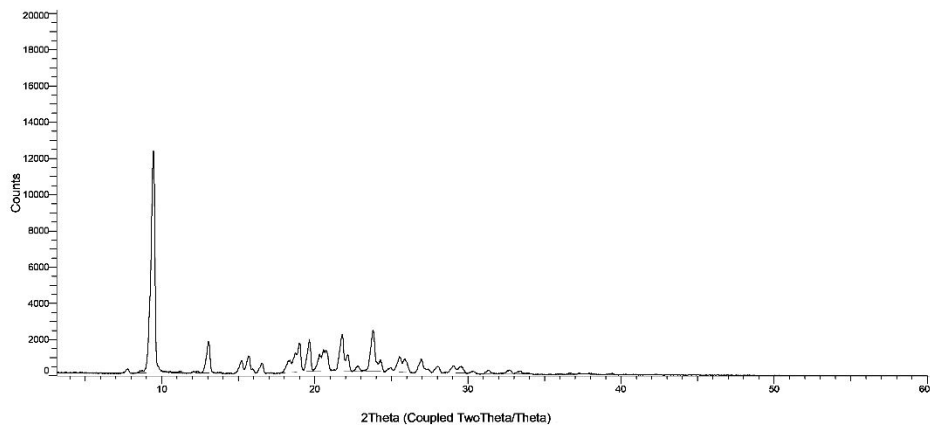

Figure S4. The X-ray powder diffractogram of azilsartan in n-propanol

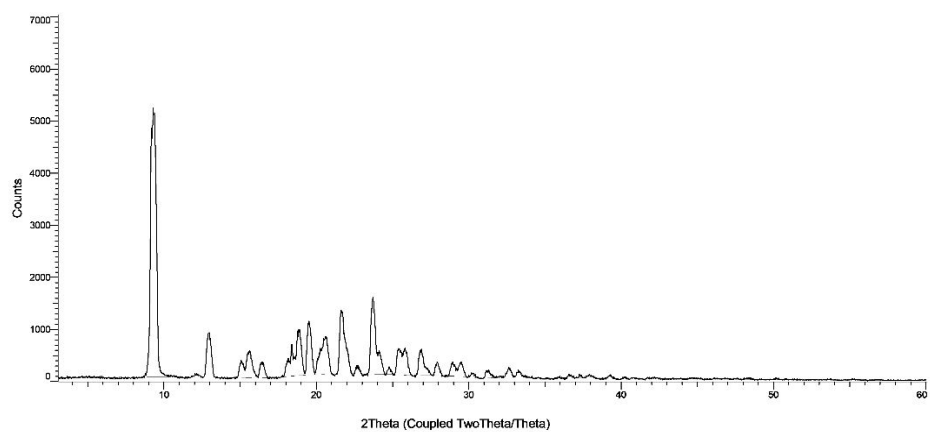

Figure S5. The X-ray powder diffractogram of azilsartan in methanol/water(8/2,v/v)

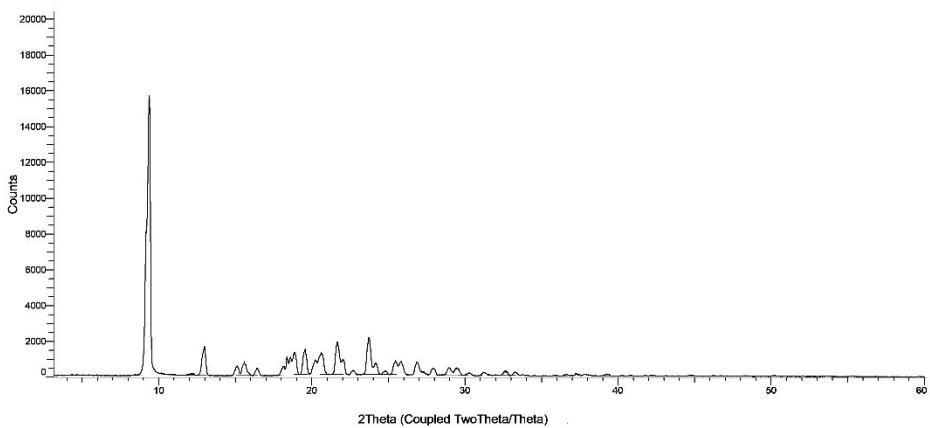

Figure S6. The X-ray powder diffractogram of azilsartan in ethanol/water(8/2,v/v)

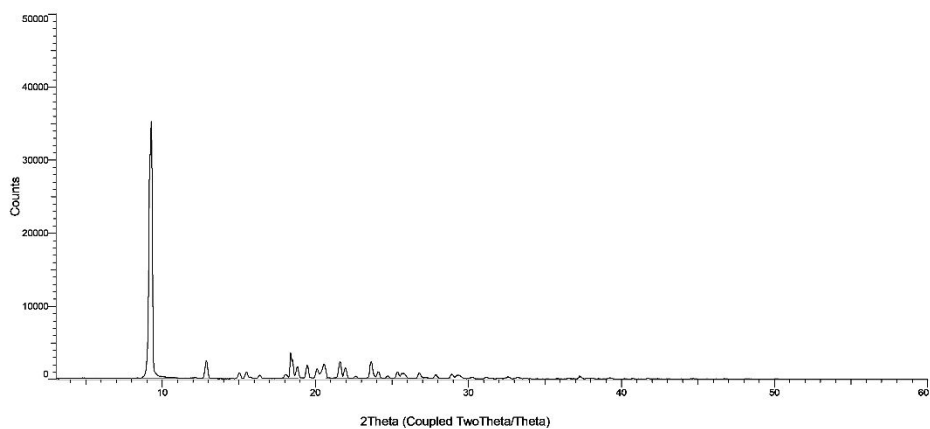

Figure S7. The X-ray powder diffractogram of azilsartan in ethanol/water(5/5,v/v)

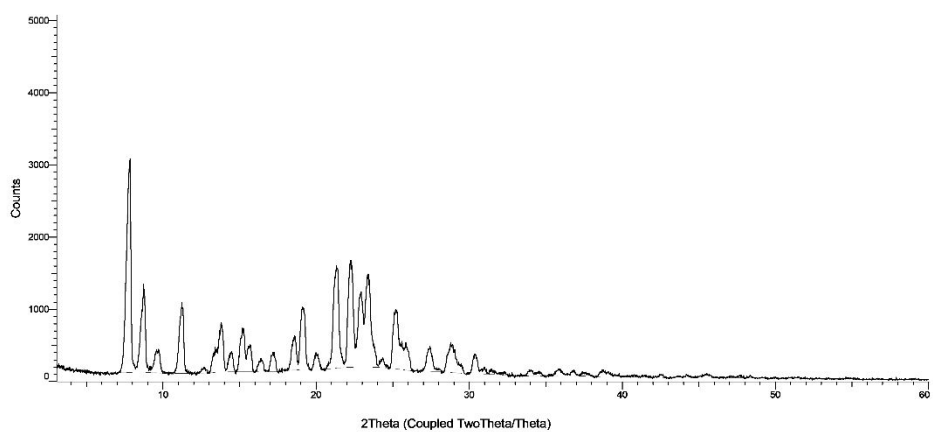

Figure S8. The X-ray powder diffractogram of azilsartan in isopropanol

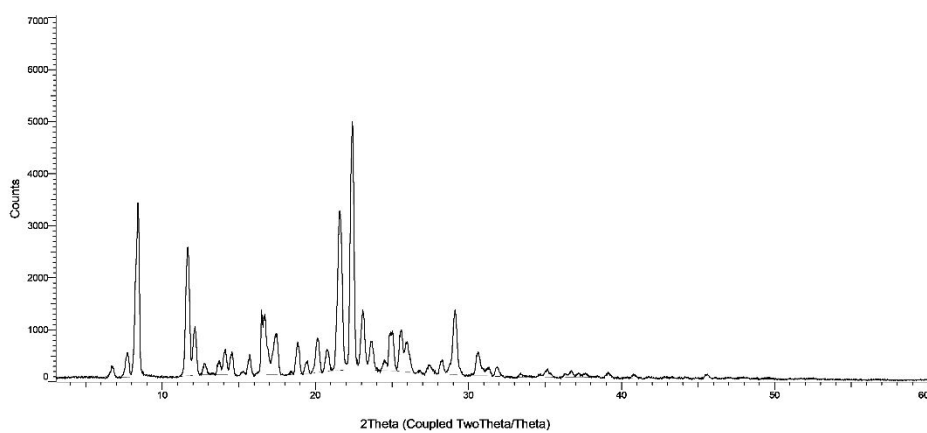

Figure S9. The X-ray powder diffractogram of azilsartan in tetrahydrofuran
